# Supplementary material for: Solid-Phase Extraction Followed by Gas Chromatography–Mass Spectrometry for Revealing the Effects of the Application of Bentonite, Tannins, and Their Combination during Fermentation in the Production of White Wine
Source: MDPI journal article supplement (doi:10.3390/chemosensors11100545), 2023-10-21
Supplement: s1 [file s1]

# Solid-phase extraction followed by gas chromatography-mass spectrometry for revealing the effects of the application of bentonite, tannins and their combination during fermentation in production of white wine

Igor Lukić <sup>1,2,\*</sup>, Ivana Horvat <sup>1</sup>, Sanja Radeka <sup>1</sup>, and Urska Vrhovsek <sup>3</sup>

<sup>1</sup> Institute of Agriculture and Tourism, K. Huguesa 8, 52440 Poreč, Croatia; igor@iptpo.hr (I. L.), ihorvat@iptpo.hr (I. H.)

<sup>2</sup> Centre of Excellence for Biodiversity and Molecular Plant Breeding, Svetošimunska 25, 10000 Zagreb, Croatia

<sup>3</sup> Metabolomics unit, Research and Innovation Centre, Fondazione Edmund Mach (FEM), Via E. Mach 1, 38098 San Michele all'Adige, TN, Italy; urska.vrhovsek@fmach.it (U.V.)

\* Correspondence: igor@iptpo.hr; Tel.: +38552408327

**Table S1.** Doses of bentonite applied for protein stabilization of Malvazija istarska wines produced by different bentonite and tannins addition treatments.

| Bentonite dose (g/hL) | Protein stability test   | Treatment |           |            |           |
|-----------------------|--------------------------|-----------|-----------|------------|-----------|
|                       |                          | CO        | B         | T          | BT        |
| Initial dose          |                          | 0         | 95        | 0          | 95        |
| Additional dose       | Heating test             | 193 ± 6   | 70 ± 0    | 167 ± 12   | 70 ± 0    |
| Total dose            |                          | 193 ± 6 a | 165 ± 0 b | 167 ± 12 b | 165 ± 0 b |
| Initial dose          |                          | 0         | 95        | 0          | 95        |
| Additional dose       | Heating with tannin test | 200 ± 0   | 83 ± 6    | 180 ± 17   | 77 ± 6    |
| Total dose            |                          | 200 ± 0 a | 178 ± 6 b | 180 ± 17 b | 172 ± 6 b |

CO - control wine without added tannins and without bentonite in fermentation, B - bentonite added near the end of fermentation, T - tannins added during fermentation without bentonite in fermentation, BT - bentonite and tannins added during fermentation in the same manner as in T and B treatments. Different lowercase letters in a row represent statistically significant differences between treatments determined by one-way ANOVA and LSD test at  $p < 0.05$ .

**Table S2.** Details of identification and quantification of free volatile aroma compounds in Malvazija istarska wines produced by different bentonite and tannins addition treatments, determined after fermentation and after final wine protein stabilization.

| Code  | Free aroma compounds                | Quantification    | ID     | t <sub>R</sub> (min:sec) | LRI <sub>exp</sub> | LRI <sub>lit</sub> | LOQ   | Conc. range (max.) | Calib. levels (No.) | R <sup>2</sup> |
|-------|-------------------------------------|-------------------|--------|--------------------------|--------------------|--------------------|-------|--------------------|---------------------|----------------|
|       |                                     |                   |        |                          |                    |                    |       |                    |                     |                |
|       | <i>Monoterpenes</i>                 |                   |        |                          |                    |                    |       |                    |                     |                |
| FV-1  | Linalool (mg/L)                     | Quantitative      | S, MS  | 20:22                    |                    |                    | 0.02  | 1                  | 10                  | > 0.99         |
| FV-2  | $\alpha$ -Terpineol (mg/L)          | Quantitative      | S, MS  | 26:30                    |                    |                    | 0.01  | 0.5                | 10                  | > 0.99         |
| FV-3  | $\alpha$ -Terpinolene*              | Semi-quantitative | S, MS  | 09:13                    |                    |                    |       |                    |                     |                |
| FV-4  | Citronellol (mg/L)                  | Quantitative      | S, MS  | 29:42                    |                    |                    | 0.01  | 0.5                | 10                  | > 0.99         |
| FV-5  | Terpendiol I*                       | Semi-quantitative | RI, MS | 37:07                    | 1948               | 1951               |       |                    |                     |                |
|       | <i>C<sub>13</sub>-norisoprenoid</i> |                   |        |                          |                    |                    |       |                    |                     |                |
| FV-6  | $\beta$ -Damascenone                | Quantitative      | S, MS  | 31:18                    |                    |                    | 1     | 10                 | 10                  | > 0.99         |
|       | <i>Alcohols</i>                     |                   |        |                          |                    |                    |       |                    |                     |                |
| FV-7  | 1-Propanol (mg/L)                   | Quantitative      | S      |                          |                    |                    | 2     | 155                | 3                   | > 0.99         |
| FV-8  | Isobutanol (mg/L)                   | Quantitative      | S      |                          |                    |                    | 2     | 154                | 3                   | > 0.99         |
| FV-9  | Isoamyl alcohol (mg/L)              | Quantitative      | S      |                          |                    |                    | 4     | 313                | 3                   | > 0.99         |
| FV-10 | 1-Hexanol (mg/L)                    | Quantitative      | S, MS  | 12:00                    |                    |                    | 0.04  | 2                  | 10                  | > 0.99         |
| FV-11 | <i>trans</i> -3-Hexenol*            | Semi-quantitative | S, MS  | 12:16                    |                    |                    |       |                    |                     |                |
| FV-12 | <i>cis</i> -3-Hexenol*              | Semi-quantitative | S, MS  | 13:06                    |                    |                    |       |                    |                     |                |
| FV-13 | 1-Octanol*                          | Semi-quantitative | S, MS  | 20:48                    |                    |                    |       |                    |                     |                |
| FV-14 | Benzyl alcohol*                     | Semi-quantitative | S, MS  | 33:36                    |                    |                    |       |                    |                     |                |
| FV-15 | 2-Phenyletanol (mg/L)               | Quantitative      | S, MS  | 35:00                    |                    |                    | 0.6   | 30                 | 10                  | > 0.99         |
|       | <i>Fatty acids</i>                  |                   |        |                          |                    |                    |       |                    |                     |                |
| FV-16 | Butyric acid (mg/L)                 | Quantitative      | S, MS  | 23:42                    |                    |                    | 0.06  | 3                  | 10                  | > 0.99         |
| FV-17 | Hexanoic acid (mg/L)                | Quantitative      | S, MS  | 32:54                    |                    |                    | 0.06  | 3                  | 10                  | > 0.99         |
| FV-18 | Octanoic acid (mg/L)                | Quantitative      | S, MS  | 41:12                    |                    |                    | 0.125 | 5                  | 10                  | > 0.99         |
| FV-19 | Decanoic acid (mg/L)                | Quantitative      | S, MS  | 48:42                    |                    |                    | 0.1   | 3                  | 10                  | > 0.99         |
| FV-20 | Dodecanoic acid*                    | Semi-quantitative | RI, MS | 56:02                    | 2477               | 2478               |       |                    |                     |                |

|       |                                   |                   |        |       |      |      |       |     |    |        |
|-------|-----------------------------------|-------------------|--------|-------|------|------|-------|-----|----|--------|
|       | <i>Ethyl esters</i>               |                   |        |       |      |      |       |     |    |        |
| FV-21 | Ethyl butyrate (mg/L)             | Quantitative      | S, MS  | 03:18 |      |      | 0.025 | 0.5 | 10 | > 0.99 |
| FV-22 | Ethyl hexanoate (mg/L)            | Quantitative      | S, MS  | 07:42 |      |      | 0.02  | 1   | 10 | > 0.99 |
| FV-23 | Ethyl octanoate (mg/L)            | Quantitative      | S, MS  | 15:18 |      |      | 0.02  | 1   | 10 | > 0.99 |
| FV-24 | Ethyl decanoate (mg/L)            | Quantitative      | S, MS  | 24:18 |      |      | 0.02  | 1   | 10 | > 0.99 |
|       | <i>Acetate esters</i>             |                   |        |       |      |      |       |     |    |        |
| FV-25 | Ethyl acetate (mg/L)              | Quantitative      | S, MS  |       |      |      | 2     | 173 | 3  | > 0.99 |
| FV-26 | Isoamyl acetate (mg/L)            | Quantitative      | S, MS  | 04:46 |      |      | 0.06  | 3   | 10 | > 0.99 |
| FV-27 | Hexyl acetate                     | Quantitative      | S, MS  | 08:57 |      |      | 10    | 200 | 10 | > 0.99 |
| FV-28 | 2-Phenethyl acetate (mg/L)        | Quantitative      | S, MS  | 31:12 |      |      | 0.06  | 3   | 10 | > 0.99 |
|       | <i>Other esters</i>               |                   |        |       |      |      |       |     |    |        |
| FV-29 | Ethyl lactate (mg/L)              | Quantitative      | S, MS  | 11:30 |      |      | 0.4   | 20  | 10 | > 0.99 |
| FV-30 | Ethyl 3-hydroxybutanoate* (mg/L)  | Semi-quantitative | RI, MS | 18:38 | 1512 | 1507 |       |     |    |        |
| FV-31 | Diethyl succinate* (mg/L)         | Semi-quantitative | RI, MS | 25:48 | 1674 | 1678 |       |     |    |        |
| FV-32 | Methyl 4-hydroxybutanoate*        | Semi-quantitative | MS     | 29:30 |      |      |       |     |    |        |
| FV-33 | Ethyl 4-hydroxybutanoate* (mg/L)  | Semi-quantitative | RI, MS | 31:16 | 1802 | 1819 |       |     |    |        |
| FV-34 | Diethyl malate* (mg/L)            | Semi-quantitative | RI, MS | 40:18 | 2034 | 2039 |       |     |    |        |
| FV-35 | Monomethyl succinate*             | Semi-quantitative | RI, MS | 51:08 | 2317 | 2350 |       |     |    |        |
| FV-36 | Monoethyl succinate* (mg/L)       | Semi-quantitative | RI, MS | 52:24 | 2373 | 2367 |       |     |    |        |
| FV-37 | Ethyl <i>p</i> -coumarate* (mg/L) | Semi-quantitative | MS     | 82:30 |      |      |       |     |    |        |
|       | <i>Other</i>                      |                   |        |       |      |      |       |     |    |        |
| FV-38 | Acetaldehyde (mg/L)               | Quantitative      | S      |       |      |      | 2     | 144 | 3  | > 0.99 |
| FV-39 | Benzaldehyde*                     | Semi-quantitative | S, MS  | 18:36 |      |      |       |     |    |        |
| FV-40 | Methanol (mg/L)                   | Quantitative      | S      |       |      |      | 2     | 151 | 3  | > 0.99 |
| FV-41 | Guaiacol*                         | Semi-quantitative | S, MS  | 33:00 |      |      |       |     |    |        |
| FV-42 | 4-Vinylguaiacol*                  | Semi-quantitative | S, MS  | 45:42 |      |      |       |     |    |        |
| FV-43 | Acetoin*                          | Semi-quantitative | S, MS  | 9:10  |      |      |       |     |    |        |
| FV-44 | 3-Hydroxy-2-pentanone*            | Semi-quantitative | RI, MS | 11:12 | 1326 | 1327 |       |     |    |        |
| FV-45 | $\gamma$ -Butyrolactone*          | Semi-quantitative | RI, MS | 22:58 | 1612 | 1607 |       |     |    |        |
| FV-46 | Pantolactone*                     | Semi-quantitative | RI, MS | 39:34 | 2016 | 2028 |       |     |    |        |

|       |                              |                   |        |       |      |      |  |  |  |  |
|-------|------------------------------|-------------------|--------|-------|------|------|--|--|--|--|
| FV-47 | 3-Methylthiopropanol* (mg/L) | Semi-quantitative | RI, MS | 27:12 | 1708 | 1710 |  |  |  |  |
| FV-48 | Tryptophol* (mg/L)           | Semi-quantitative | MS     | 81:18 |      |      |  |  |  |  |

Abbreviations: ID – identification of compounds; S – retention time consistent with that of a pure standard; LRI – linear retention index consistent with that found in literature; MS – mass spectra consistent with that from NIST 2.0 mass spectra electronic library or literature;  $t_R$  retention time in minutes:seconds;  $LRI_{exp}$  - linear retention index obtained experimentally;  $LRI_{lit}$  - linear retention index from the literature; LOQ – limit of quantification;  $R^2$  – coefficients of determination of calibration curves used for quantification.

**Table S3.** Details of identification and quantification of bound aroma compounds in Malvazija istarska wines produced by different bentonite and tannins addition treatments, determined after fermentation and after final wine protein stabilization.

| Code  | Bound aroma compounds                  | Quantification    | ID     | t <sub>R</sub> (min:sec) | LRI <sub>exp</sub> | LRI <sub>lit</sub> | LOQ  | Conc. range (max.) | Calib. Levels (No.) | R <sup>2</sup> |
|-------|----------------------------------------|-------------------|--------|--------------------------|--------------------|--------------------|------|--------------------|---------------------|----------------|
|       |                                        |                   |        |                          |                    |                    |      |                    |                     |                |
|       | <i>Monoterpenes</i>                    |                   |        |                          |                    |                    |      |                    |                     |                |
| BV-1  | <i>trans</i> -furan Linalool oxide*    | Semi-quantitative | S, MS  | 15:10                    |                    |                    |      |                    |                     |                |
| BV-2  | <i>cis</i> -furan Linalool oxide*      | Semi-quantitative | S, MS  | 16:24                    |                    |                    |      |                    |                     |                |
| BV-3  | Linalool (mg/L)                        | Quantitative      | S, MS  | 20:06                    |                    |                    | 0.02 | 1                  | 10                  | > 0.99         |
| BV-4  | Hotrienol*                             | Semi-quantitative | RI, MS | 22:46                    | 1608               | 1613               |      |                    |                     |                |
| BV-5  | $\alpha$ -Terpineol (mg/L)             | Quantitative      | S, MS  | 26:34                    |                    |                    | 0.01 | 0.25               | 10                  | > 0.99         |
| BV-6  | <i>trans</i> -pyran Linalool oxide*    | Semi-quantitative | RI, MS | 27:58                    | 1730               | 1740               |      |                    |                     |                |
| BV-7  | Citronellol (mg/L)                     | Quantitative      | S, MS  | 29:42                    |                    |                    | 0.01 | 0.5                | 10                  | > 0.99         |
| BV-8  | Nerol (mg/L)                           | Quantitative      | S, MS  | 30:40                    |                    |                    | 0.01 | 0.5                | 10                  | > 0.99         |
| BV-9  | Geraniol (mg/L)                        | Quantitative      | S, MS  | 32:48                    |                    |                    | 0.01 | 0.5                | 10                  | > 0.99         |
| BV-10 | Terpendiol I*                          | Semi-quantitative | RI, MS | 36:54                    | 1948               | 1951               |      |                    |                     |                |
| BV-11 | <i>trans</i> -8-Hydroxy-linalool*      | Semi-quantitative | RI, MS | 48:38                    | 2266               | 2246               |      |                    |                     |                |
| BV-12 | 7-Hydroxy-geraniol*                    | Semi-quantitative | MS     | 49:54                    |                    |                    |      |                    |                     |                |
| BV-13 | <i>cis</i> -8-Hydroxy-linalool*        | Semi-quantitative | RI, MS | 49:57                    | 2305               | 2292               |      |                    |                     |                |
| BV-14 | <i>trans</i> -Geranic acid*            | Semi-quantitative | S, MS  | 50:46                    |                    |                    |      |                    |                     |                |
|       | <i>C<sub>13</sub>-norisoprenoids</i>   |                   |        |                          |                    |                    |      |                    |                     |                |
| BV-15 | $\beta$ -Damascenone                   | Quantitative      | S, MS  | 31:18                    |                    |                    | 0.25 | 2                  | 10                  | > 0.99         |
| BV-16 | 3-Hydroxy- $\beta$ -damascone*         | Semi-quantitative | RI, MS | 56:42                    | 2510               | 2504               |      |                    |                     |                |
| BV-17 | 3-Oxo- $\alpha$ -ionol*                | Semi-quantitative | RI, MS | 59:41                    | 2597               | 2615               |      |                    |                     |                |
| BV-18 | 3-Hydroxy-7,8-dihydro- $\beta$ -ionol* | Semi-quantitative | RI, MS | 63:41                    | 2738               | 2770               |      |                    |                     |                |
| BV-19 | Vomifoliol*                            | Semi-quantitative | MS     | 74:05                    |                    |                    |      |                    |                     |                |
|       | <i>Alcohols</i>                        |                   | RI, MS |                          |                    |                    |      |                    |                     |                |
| BV-20 | 1-Hexanol (mg/L)                       | Quantitative      | S, MS  | 11:37                    |                    |                    | 0.04 | 1                  | 10                  | > 0.99         |
| BV-21 | <i>trans</i> -3-Hexenol*               | Semi-quantitative | RI, MS | 12:07                    | 1346               | 1356               |      |                    |                     |                |
| BV-22 | <i>cis</i> -3-Hexenol*                 | Semi-quantitative | S, MS  | 12:48                    |                    |                    |      |                    |                     |                |

|       |                          |                   |       |       |  |  |  |  |  |  |
|-------|--------------------------|-------------------|-------|-------|--|--|--|--|--|--|
| BV-23 | <i>trans</i> -2-Hexenol* | Semi-quantitative | S, MS | 13:48 |  |  |  |  |  |  |
| BV-24 | 1-Octen-3-ol*            | Semi-quantitative | S, MS | 15:46 |  |  |  |  |  |  |
| BV-25 | 1-Octanol*               | Semi-quantitative | S, MS | 20:27 |  |  |  |  |  |  |
| BV-26 | 2-Phenylethanol*         | Semi-quantitative | S, MS | 34:42 |  |  |  |  |  |  |
|       | <i>Other</i>             |                   |       |       |  |  |  |  |  |  |
| BV-27 | Benzaldehyde*            | Semi-quantitative | S, MS | 18:40 |  |  |  |  |  |  |
| BV-28 | 4-Vinylguaiacol*         | Semi-quantitative | S, MS | 45:26 |  |  |  |  |  |  |
| BV-29 | Tryptophol*              | Semi-quantitative | MS    | 81:00 |  |  |  |  |  |  |

Abbreviations: ID – identification of compounds; S – retention time consistent with that of a pure standard; LRI – linear retention index consistent with that found in literature; MS – mass spectra consistent with that from NIST 2.0 mass spectra electronic library or literature;  $t_R$  retention time in minutes:seconds;  $LRI_{exp}$  - linear retention index obtained experimentally;  $LRI_{lit}$  - linear retention index from the literature; LOQ – limit of quantification;  $R^2$  – coefficients of determination of calibration curves used for quantification.

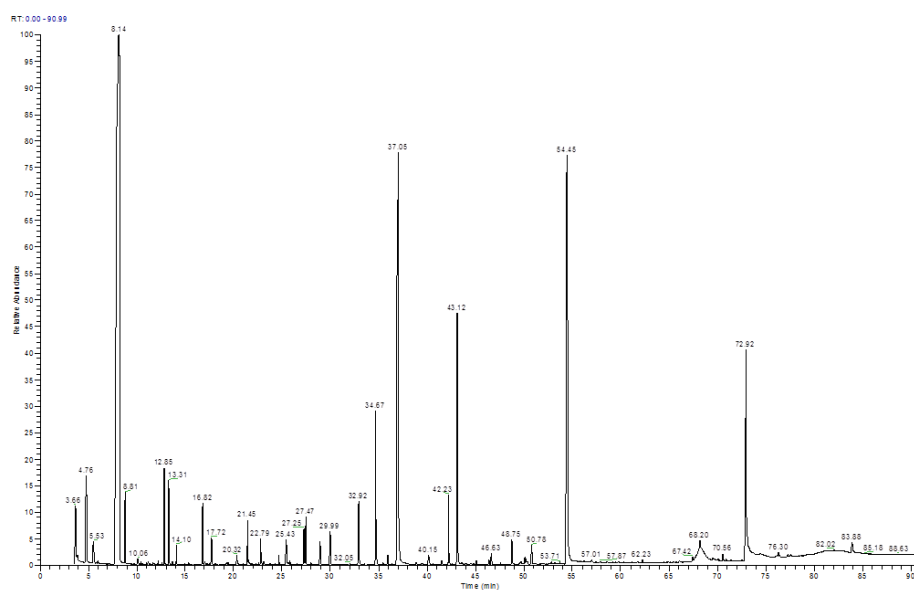

a)

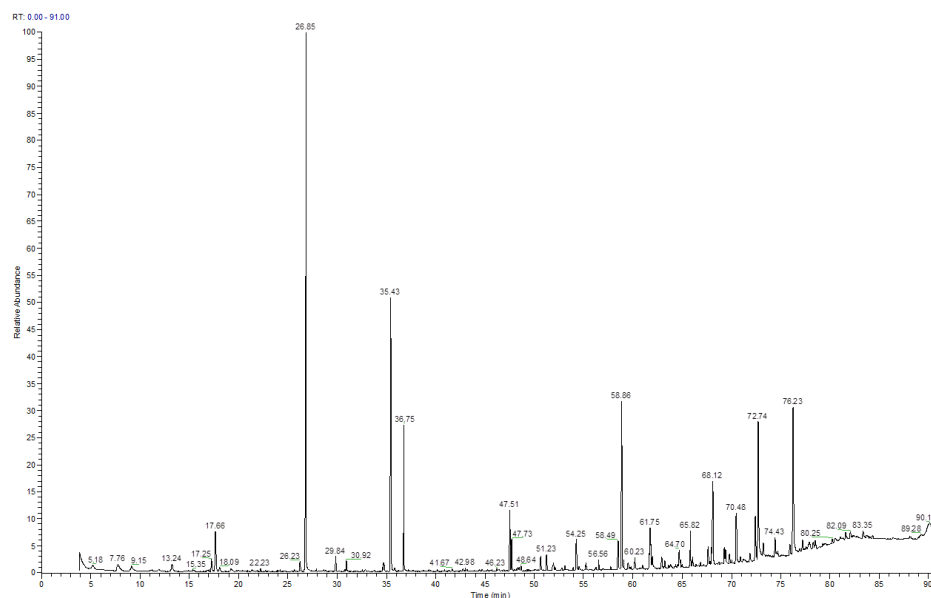

b)

**Figure S1.** (a) Representative GC-MS chromatograms of a SPE extract of free volatile aroma compounds from Malvazija istarska white wine; (b) Representative GC-MS chromatograms of a SPE extract of bound aroma compounds from Malvazija istarska white wine.
